# Supplementary material for: Functional and Genetic Diversity of Bacteria Associated with the Surfaces of Agronomic Plants
Source: MDPI journal article supplement (doi:10.3390/plants8040091), 2019-04-04
Supplement: s1 [file s1]

## Supplementary material

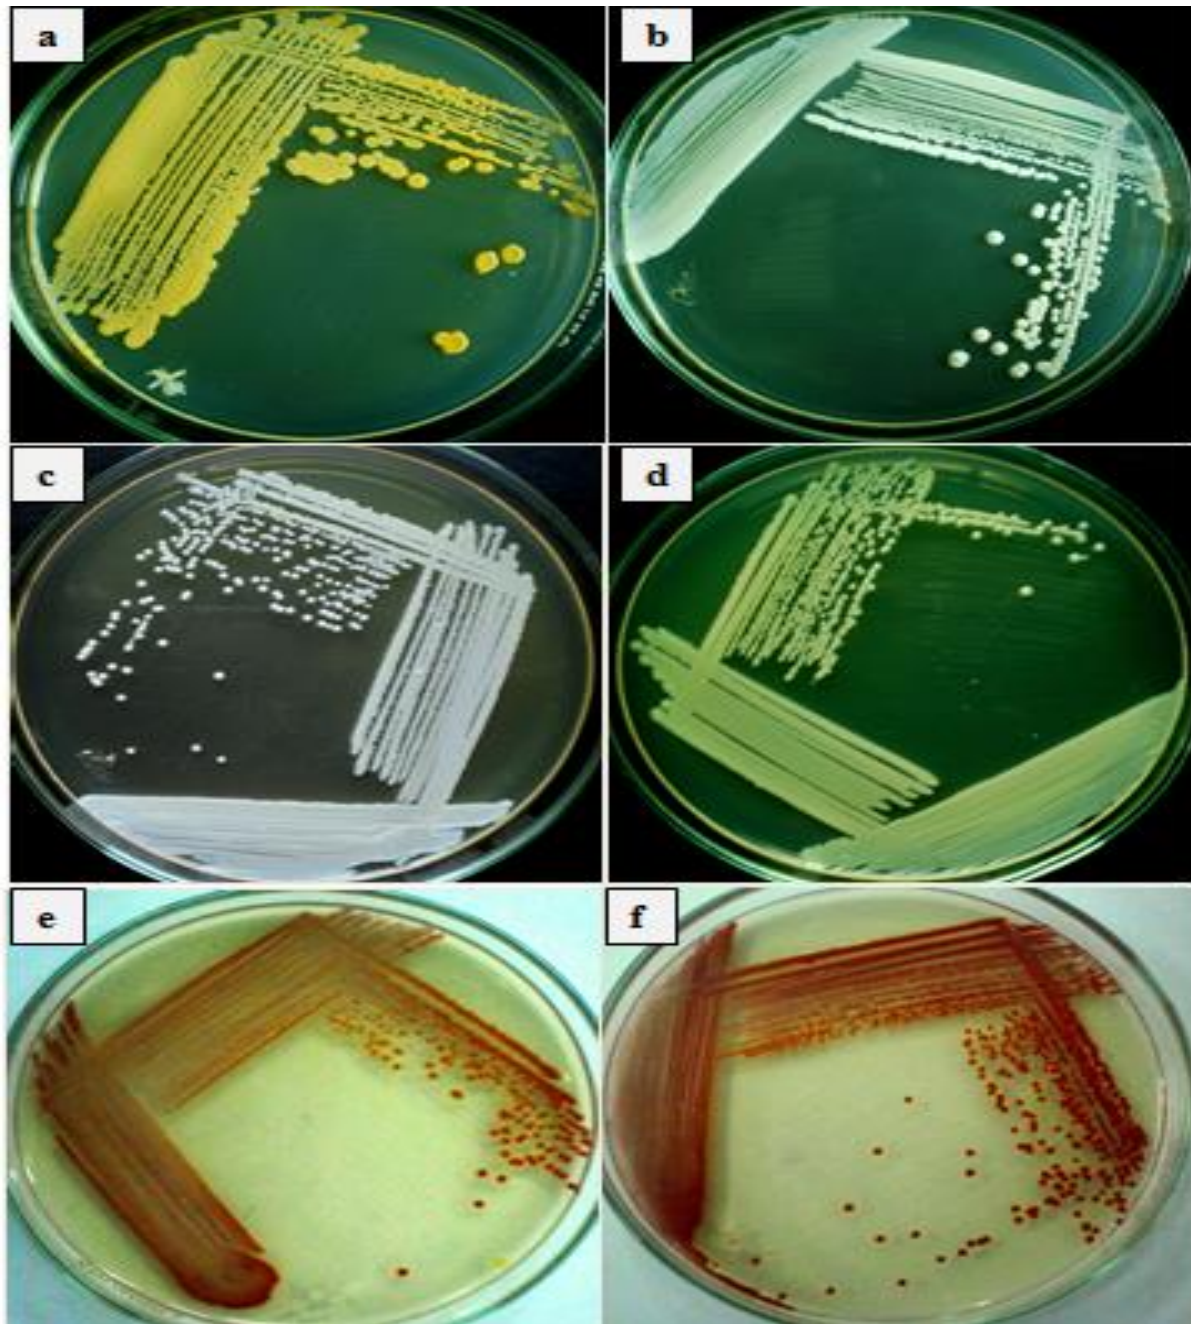

**Figure S1.** Purified bacterial colonies on LB agar. (a) = BPb-3, (b) = Lc-92, (c) = MCB-3, (d) = Mc-4, (e) = Lc-32, (f) = LCr-22

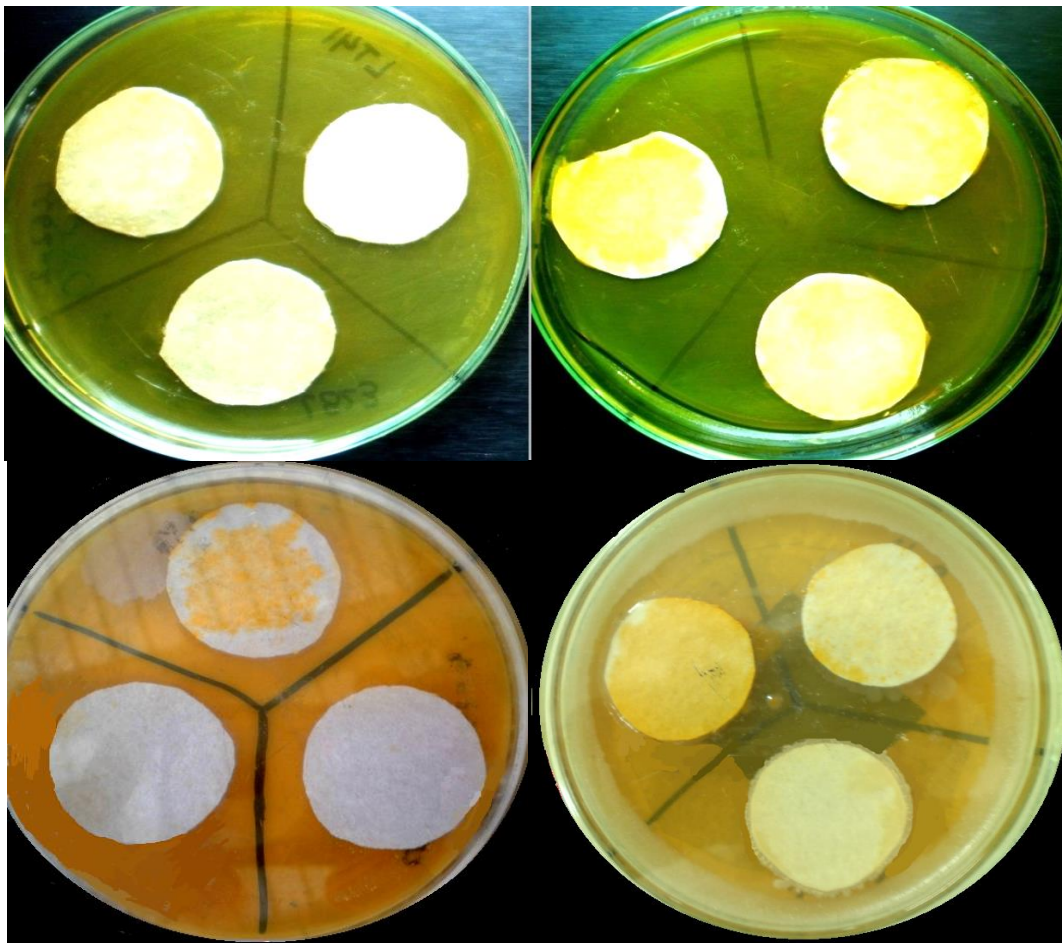

**Figure S2.** HCN production by different purified bacterial isolates that included BPb-5, BPc-1, Lt-73, Eb-8, MCb-3, MSt-8, BPc-3, Eb-9, Xt-3, Lb-61, Eb-10, Xc-5.

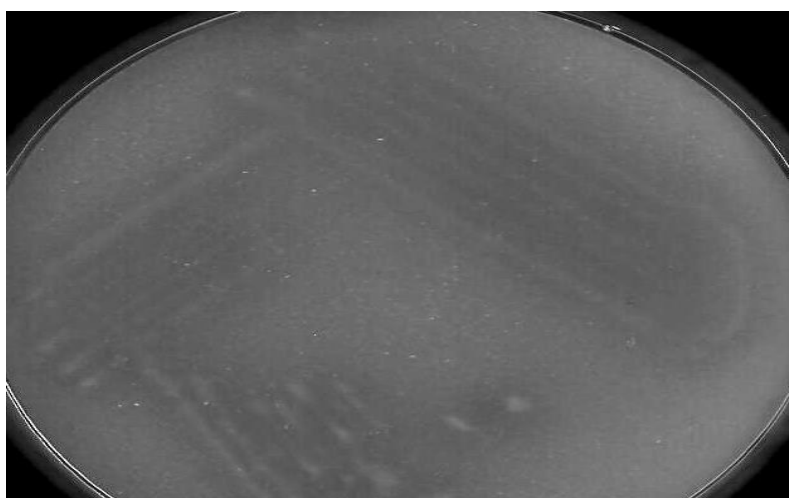

**Figure S3.** Phosphate solubilization by *A. caloaceticus* Eb-8 on Pikovskaya medium.

**Table S1.** Auxin production and biofilm formation by plant associated bacteria

| Serial No. | Strains                                  | Auxin production with tryptophan |                      | Biofilm production<br>$\lambda = 570$ |
|------------|------------------------------------------|----------------------------------|----------------------|---------------------------------------|
|            |                                          | 0 $\mu\text{g/ml}$               | 500 $\mu\text{g/ml}$ |                                       |
| 1          | Control                                  | -                                | -                    | 0.14 a                                |
| 2          | <i>Acinetobacter calcoaceticus</i> BPb-3 | 21.88 g-l                        | 28.67 a-d            | 0.87 o-s                              |
| 3          | <i>Staphylococcus aureus</i> BPb-5       | 17.95 a-i                        | 29.24 a-d            | 0.65 f-o                              |
| 4          | <i>Serratia rubidaea</i> BPc-1           | 20.60 d-l                        | 27.24 a-d            | 0.33 abc                              |
| 5          | <i>Pantoea dispersa</i> BPc-3            | 16.52 a-i                        | 21.17 a-d            | 0.50 b-i                              |
| 6          | <i>Bacillus cereus</i> BPc-4             | 13.46 abc                        | 22.24 a-d            | 0.83 m-s                              |
| 7          | <i>S. equorum</i> BPt-5                  | 16.58 a-i                        | 20.24 a-d            | 0.30 ab                               |
| 8          | <i>Klebsiella pneumoniae</i> Eb-1        | 33.88 o                          | 75.45 f              | 1.11 tu                               |
| 9          | <i>B. thuringiensis</i> Eb-10            | 15.18 a-f                        | 21.00 a-d            | 0.38 b-e                              |
| 10         | <i>Pantoea vagans</i> Eb-2               | 18.62 a-i                        | 42.45 b-e            | 0.47 b-h                              |
| 11         | <i>A. calcoaceticus</i> Eb-4             | 13.95 a-e                        | 35.38 a-e            | 0.81 l-s                              |
| 12         | <i>Burkholderia cepacia</i> Eb-6         | 25.74 j-m                        | 40.95 a-e            | 0.98 rst                              |
| 13         | <i>A. calcoaceticus</i> Eb-8             | 26.25 k-m                        | 43.81 de             | 1.33 v                                |
| 14         | <i>B. cereus</i> Eb-9                    | 16.36 a-i                        | 28.95 a-d            | 0.58 d-l                              |
| 15         | <i>S. rubidaea</i> EMc-2                 | 12.24 a                          | 38.10 a-e            | 0.84 n-s                              |
| 16         | <i>B. anthracis</i> EMc-3                | 13.95 a-e                        | 18.72 ab             | 0.35 a-d                              |
| 17         | <i>A. calcoaceticus</i> EMc-4            | 15.53 a-g                        | 19.74 abc            | 0.78 k-q                              |
| 18         | <i>A. bouvetii</i> EMt-1                 | 15.92 a-h                        | 25.17 a-d            | 0.47 b-h                              |
| 19         | <i>Enterobacter amnigenus</i> EMt-5      | 16.81 a-i                        | 24.24 a-d            | 0.39 b-e                              |
| 20         | <i>Arthrobacter nicotianae</i> Lb-41     | 22.88 i-l                        | 27.67 a-d            | 3.42 y                                |
| 21         | <i>B. subtilis</i> Lb-61                 | 19.53 b-j                        | 35.24 a-e            | 0.55 c-k                              |
| 22         | <i>A. calcoaceticus</i> Lc-52            | 16.35 a-i                        | 29.02 a-d            | 0.39 b-e                              |
| 23         | <i>S. rubidaea</i> Lcr-22                | 32.71 n-o                        | 36.81 a-e            | 1.28 uv                               |
| 24         | <i>B. cereus</i> Lcw-22                  | 18.25 a-i                        | 40.24 a-e            | 1.48 v                                |
| 25         | <i>S. xylosus</i> Lt-41                  | 27.47 l-n                        | 33.53 a-d            | 1.43 v                                |
| 26         | <i>S. warneri</i> Lt-73                  | 19.76 c-k                        | 41.45 a-e            | 0.69 g-p                              |
| 27         | <i>S. rubidaea</i> Mc-2                  | 30.12 m-o                        | 77.81 f              | 1.03 st                               |
| 28         | <i>Stenotrophomonas maltophilia</i> Mc-3 | 18.81 a-i                        | 29.02 a-d            | 1.02 st                               |
| 29         | <i>A. calcoaceticus</i> Mc-4             | 21.82 g-l                        | 30.38 a-d            | 0.75 j-q                              |

|    |                                        |           |           |          |
|----|----------------------------------------|-----------|-----------|----------|
| 30 | <i>S. arlettae</i> MCB-3               | 14.87 a-f | 24.74 a-d | 2.16 x   |
| 31 | <i>Exiguobacterium mexicanum</i> MCB-4 | 20.80 e-k | 22.95 a-d | 2.21 x   |
| 32 | <i>B. cereus</i> MCB-6                 | 21.39 f-l | 19.81 abc | 0.61 e-n |
| 33 | <i>B. subtilis</i> MCB-8               | 17.67 a-i | 40.96 a-e | 0.71 h-p |
| 34 | <i>S. maltophilia</i> MCT-1            | 50.78 p   | 101.1 g   | 0.53 b-j |
| 35 | <i>Kluyvera cryocresens</i> MCT-5      | 13.68 a-d | 58.17 ef  | 1.93 w   |
| 36 | <i>S. ureilytica</i> MCT-6             | 18.76 a-i | 33.60 a-d | 0.39 b-e |
| 37 | <i>B. cereus</i> MSB-3                 | 18.82 a-i | 68.17 f   | 0.70 h-p |
| 38 | <i>B. anthracis</i> MSB-4              | 13.90 a-e | 19.67 abc | 1.29 uv  |
| 39 | <i>Pantoea</i> sp. MSc-1               | 12.72 ab  | 17.67 a   | 0.47 b-h |
| 40 | <i>S. warneri</i> MSc-5                | 18.87 a-i | 28.46 a-d | 1.40 v   |
| 41 | <i>S. xylosus</i> MSt-1                | 17.78 a-i | 30.95 a-d | 0.73 i-q |
| 42 | <i>S. gallinarum</i> MSt-3             | 17.15 a-i | 28.10 a-d | 0.67 f-o |
| 43 | <i>A. calcoaceticus</i> MSt-6          | 15.45 a-g | 19.38 abc | 0.44 b-f |
| 44 | <i>B. cereus</i> MSt-7                 | 21.17 f-l | 42.36 b-e | 0.46 b-g |
| 45 | <i>B. cereus</i> MSt-8                 | 14.56 a-f | 28.60 a-d | 0.95 q-t |
| 46 | <i>B. cereus</i> PCt-1                 | 22.64 h-l | 97.24 g   | 0.59 d-m |
| 47 | <i>E. cloacae</i> PCt-2                | 34.28 o   | 71.10 f   | 0.91 p-t |
| 48 | <i>S. rubidaea</i> Xb-3                | 18.1 a-i  | 27.8 a-d  | 0.69 g-p |
| 49 | <i>B. anthracis</i> Xb-6               | 16.05 a-i | 29.24 a-d | 0.30 ab  |
| 50 | <i>E. cloacae</i> Xc-3                 | 31.77 m-o | 43.35 cde | 0.70 h-p |
| 51 | <i>Pseudomonas putida</i> Xc-5         | 16.52 a-i | 20.93 a-d | 0.47 b-h |
| 52 | <i>Citrobacter freundii</i> Xc-6       | 14.83 a-f | 42.45 b-e | 0.40 b-e |
| 53 | <i>Lysinibacillus. fusiformis</i> Xc-7 | 14.1 a-e  | 20.52 a-d | 0.54 b-j |
| 54 | <i>S. xylosus</i> Xt-1                 | 18.23 a-i | 42.6 be   | 2.16 x   |
| 55 | <i>C. werkmanii</i> Xt-3               | 20.53 a-i | 29.3 a-d  | 1.22 u   |
| 56 | <i>L. fusiformis</i> Xt-6              | 36.48 o   | 65.10 f   | 0.50 b-i |

Means of three replicates. Different letters within the same column indicate significant difference between treatments using Duncan's multiple range test ( $P \leq 0.05$ ).

**Table S2.** Phosphate solubilization and HCN production by different bacterial isolates

| S. No | Strains                                  | Phosphate solubilization | HCN production |
|-------|------------------------------------------|--------------------------|----------------|
| 1     | <i>Acinetobacter calcoaceticus</i> BPb-3 | ++                       | +              |
| 2     | <i>Staphylococcus aureus</i> BPb-5       | -                        | -              |
| 3     | <i>Serratia rubidaea</i> BPc-1           | +                        | -              |
| 4     | <i>Pantoea dispersa</i> BPc-3            | -                        | +++            |
| 5     | <i>Bacillus cereus</i> BPc-4             | -                        | -              |
| 6     | <i>S. equorum</i> BPt-5                  | -                        | ++             |
| 7     | <i>Klebsiella pneumoniae</i> Eb-1        | ++                       | -              |
| 8     | <i>B. thuringiensis</i> Eb-10            | -                        | +              |
| 9     | <i>Pantoea vagans</i> Eb-2               | +                        | -              |
| 10    | <i>A. calcoaceticus</i> Eb-4             | ++++                     | +              |
| 11    | <i>Burkholderia cepacia</i> Eb-6         | +                        | -              |
| 12    | <i>A. calcoaceticus</i> Eb-8             | ++++                     | ++             |
| 13    | <i>B. cereus</i> Eb-9                    | +                        | -              |
| 14    | <i>S. rubidaea</i> EMc-2                 | +                        | -              |
| 15    | <i>B. anthracis</i> EMc-3                | -                        | +              |
| 16    | <i>A. calcoaceticus</i> EMc-4            | +                        | -              |
| 17    | <i>A. bouvetii</i> EMt-1                 | -                        | +              |
| 18    | <i>Enterobacter amnigenus</i> EMt-5      | -                        | -              |
| 19    | <i>Arthrobacter nicotianae</i> Lb-41     | -                        | -              |
| 20    | <i>B. subtilis</i> Lb-61                 | -                        | +++            |
| 21    | <i>A. calcoaceticus</i> Lc-52            | -                        | -              |
| 22    | <i>S. rubidaea</i> Lcr-22                | -                        | +              |
| 23    | <i>B. cereus</i> Lcw-22                  | -                        | +              |
| 24    | <i>S. xylosus</i> Lt-41                  | +                        | +              |
| 25    | <i>S. warneri</i> Lt-73                  | -                        | -              |
| 26    | <i>S. rubidaea</i> Mc-2                  | -                        | +              |
| 27    | <i>Stenotrophomonas maltophilia</i> Mc-3 | -                        | +              |
| 28    | <i>A. calcoaceticus</i> Mc-4             | -                        | -              |
| 29    | <i>S. arlettae</i> MCB-3                 | -                        | ++             |
| 30    | <i>Exiguobacterium mexicanum</i> MCB-4   | -                        | +              |
| 31    | <i>B. cereus</i> MCB-6                   | -                        | +              |
| 32    | <i>B. subtilis</i> MCB-8                 | ++                       | -              |
| 33    | <i>S. maltophilia</i> MCT-1              | -                        | -              |
| 34    | <i>Kluyvera cryocresens</i> MCT-5        | -                        | -              |
| 35    |                                          |                          |                |

|    |                                        |    |    |
|----|----------------------------------------|----|----|
| 36 | <i>B. cereus</i> MSb-3                 | ++ | -  |
| 37 | <i>B. anthracis</i> MSb-4              | +  | -  |
| 38 | <i>Pantoea</i> sp. MSc-1               | +  | +  |
| 39 | <i>S. warneri</i> MSc-5                | +  | -  |
| 40 | <i>S. xylosum</i> MSt-1                | -  | +  |
| 41 | <i>S. gallinarum</i> MSt-3             | -  | -  |
| 42 | <i>A. calcoaceticus</i> MSt-6          | -  | -  |
| 43 | <i>B. cereus</i> MSt-7                 | -  | -  |
| 44 | <i>B. cereus</i> MSt-8                 | +  | ++ |
| 45 | <i>B. cereus</i> PCt-1                 | -  | +  |
| 46 | <i>E. cloacae</i> PCt-2                | -  | +  |
| 47 | <i>S. rubidaea</i> Xb-3                | -  | +  |
| 48 | <i>B. anthracis</i> Xb-6               | -  | +  |
| 49 | <i>E. cloacae</i> Xc-3                 | -  | +  |
| 50 | <i>Pseudomonas putida</i> Xc-5         | -  | -  |
| 51 | <i>Citrobacter freundii</i> Xc-6       | -  | -  |
| 52 | <i>Lysinibacillus. fusiformis</i> Xc-7 | -  | +  |
| 53 | <i>S. xylosum</i> Xt-1                 | -  | +  |
| 54 | <i>C. werkmanii</i> Xt-3               | -  | -  |
| 55 | <i>L. fusiformis</i> Xt-6              | -  | ++ |

Number of '+' shows the intensity of the positive reaction where '++++' and '+' show the strongly and weakly positive reactions, respectively. The sign '-' shows the negative result.
